# Supplementary material for: A ductile and strong-affinity network binder coupling inorganic oligomers and biopolymers for high-loading lithium–sulfur batteries
Source: Royal Society of Chemistry journal article supplement (doi:10.1039/d3dt00550j), 2023-01-01
Supplement: d3dt00550j1.pdf [file d3dt00550j1.pdf]

## Supporting Information

# A ductile and strong-affinity network binder coupling inorganic oligomers and biopolymers for high-loading lithium-sulfur batteries

Mingxiu Hou<sup>a, b</sup>, Jie Liu<sup>a, c, \*</sup>, Fengli Yu<sup>a, b</sup>, Lei Wang<sup>a, b, \*</sup>

<sup>a</sup> *State Key Laboratory Base of Eco-chemical Engineering, International Science and Technology Cooperation Base of Eco-chemical Engineering and Green Manufacturing, Qingdao University of Science and Technology, Qingdao 266042, China*

*E-mail: jie.liu@qust.edu.cn (J. Liu), inorchemwl@126.com (L. Wang)*

<sup>b</sup> *College of Chemistry and Molecular Engineering, Qingdao University of Science and Technology, Qingdao 266042, China*

<sup>c</sup> *College of Chemical Engineering, Qingdao University of Science and Technology, Qingdao 266042, China*

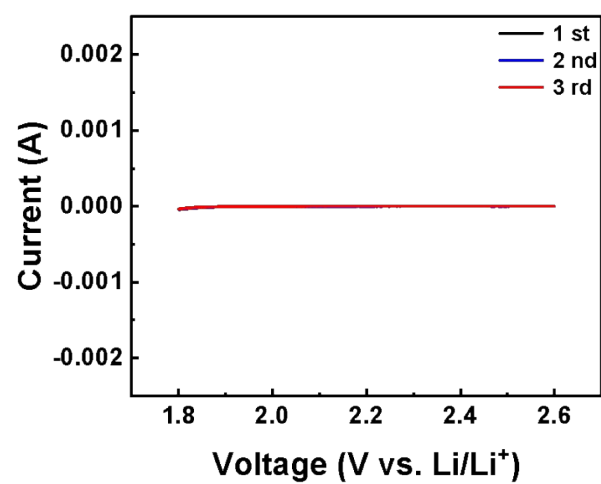

**Fig. S1.** Cyclic voltammetry (CV) curves of the KB@TSG-PTP electrode at a scan rate of  $0.1 \text{ mV s}^{-1}$ .

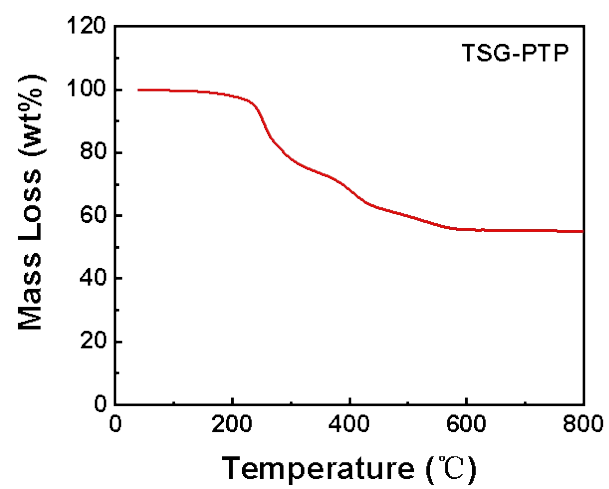

**Fig. S2.** TGA curve of TSG-PTP under the air atmosphere with the heating rate of 10 °C min<sup>-1</sup>.

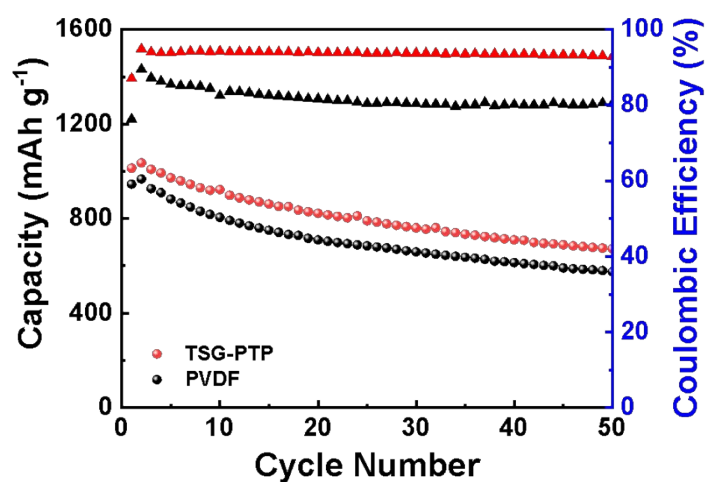

**Fig. S3.** Cycling performance of Li-S batteries using different binders at 0.2 C (the first cycle is at 0.1 C). The sulfur cathodes consist of 80 wt% S/super P composite, 10 wt% KB, and 10 wt% binder. The electrolyte is 1M LiTFSI in DOL : DME (1:1 Vol%) without LiNO<sub>3</sub> additive.

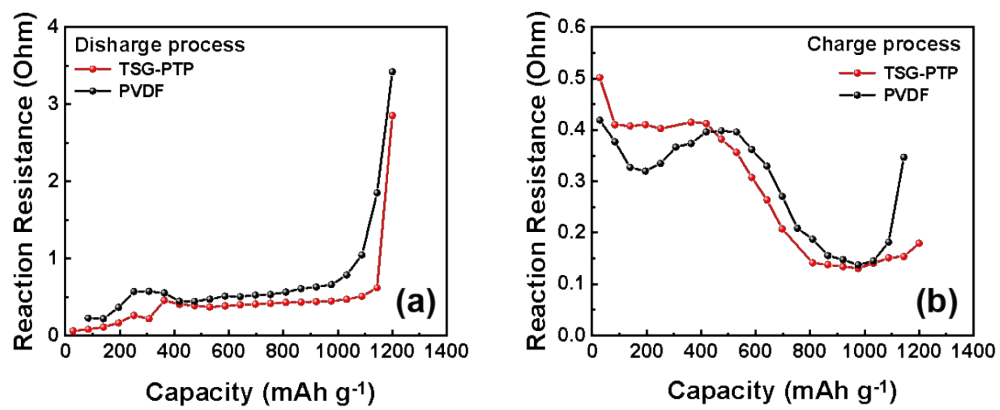

**Fig. S4.** Comparison of reaction resistances of sulfur electrodes with different binders

(a) during discharge process and (b) during charge process.

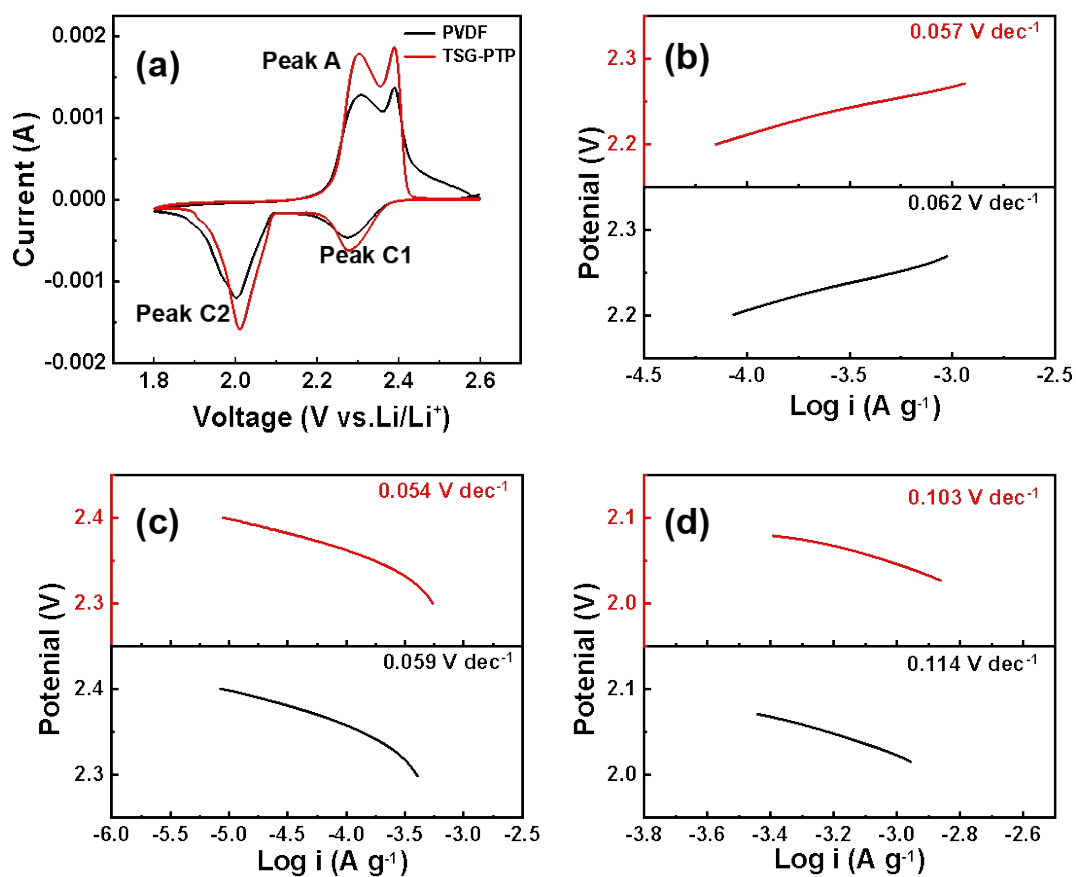

**Fig. S5.** (a) CV curves of the sulfur electrodes with different binders at a scan rate of  $0.1 \text{ mV s}^{-1}$ . Tafel plots of (b) peak A, (c) peak C1, and (d) peak C2 in (a).

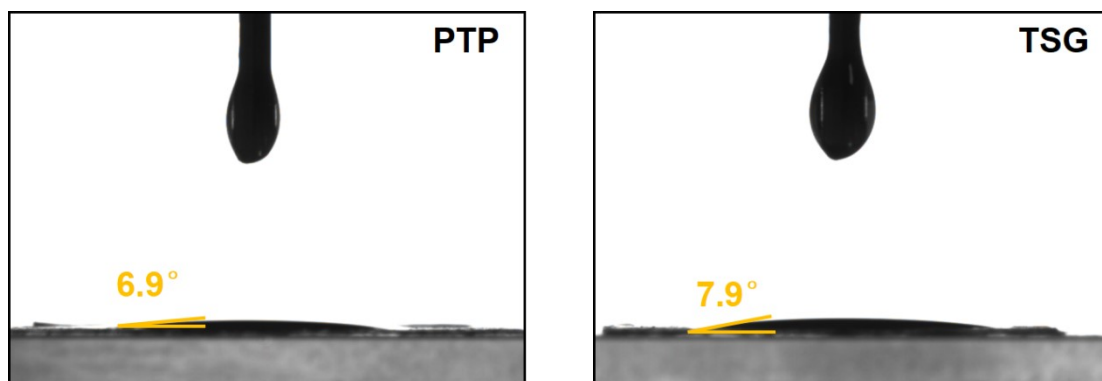

**Fig. S6.** Contact angle of the electrolyte towards S@PTP electrode and S@TSG electrode.

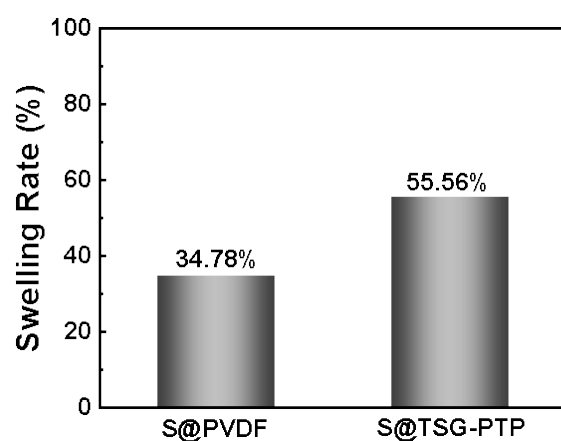

**Fig. S7.** The swelling rate of S@PVDF and S@TSG-PTP electrodes after immersion in electrolyte for 24 h. The swelling rate is defined as  $(W_{24}-W_0)/W_0*100\%$ , where  $W_{24}$  is the weight of electrode coating after immersion in electrolyte for 24 h,  $W_0$  is the weight of electrode coating before immersion in electrolyte.



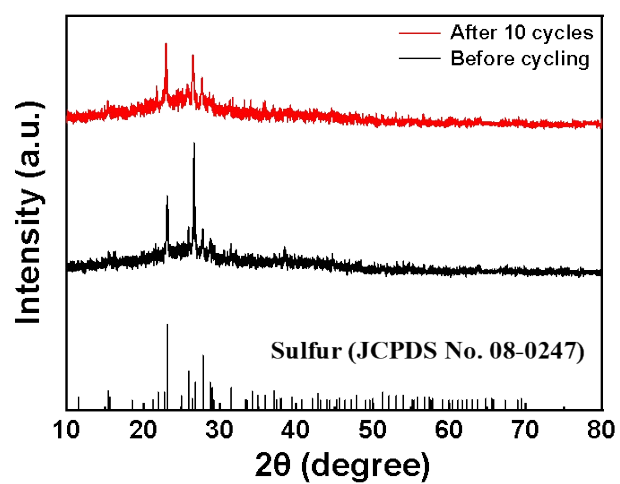

**Fig. S8.** XRD patterns of S@TSG-PTP electrode before cycling and after 10 cycles.

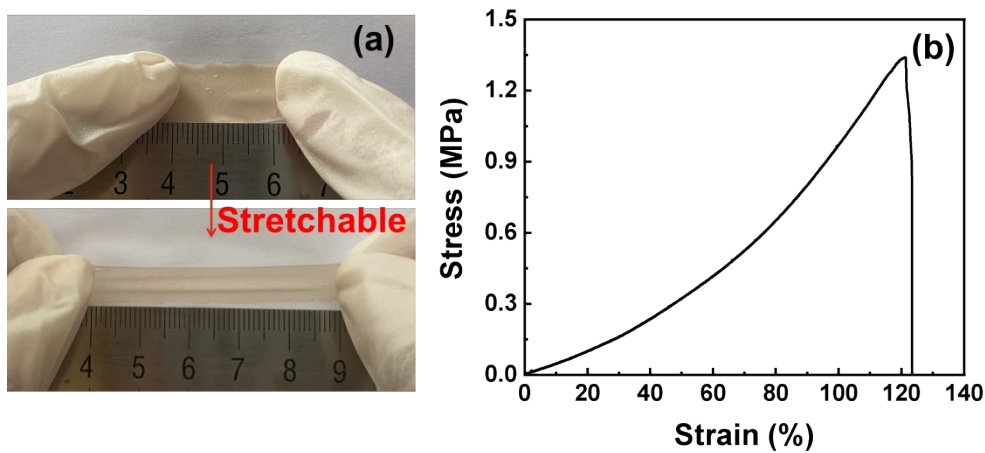

**Fig. S9.** (a) Optical photographs of the TSP-PTP film showing its stretchability; (b) stress-strain curve of TSP-PTP film.

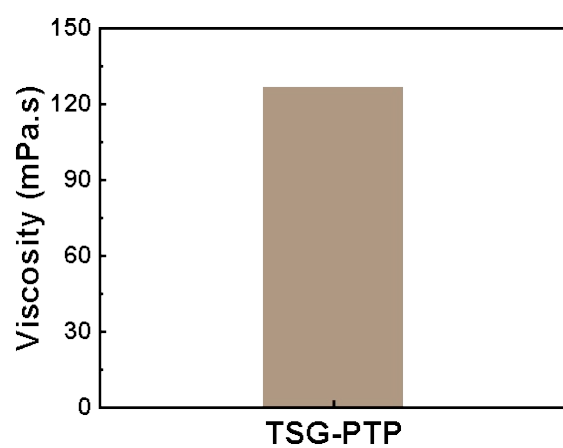

**Fig. S10.** Viscosity of 2 wt% TSG-PTP aqueous solution obtained by rotor 3 on a viscosity analyzer (Techcomp SNP-1).

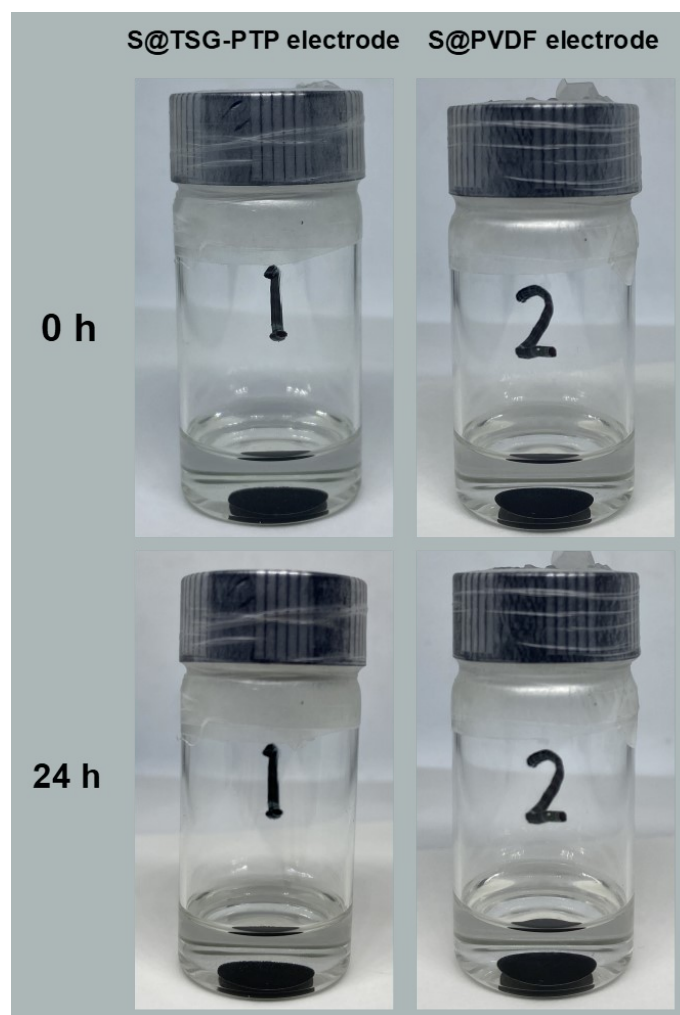

**Fig. S11.** Photographs of the S@TSG-PTP electrode and S@PVDF electrode soaked in the electrolyte after 0 h and after 24 h.

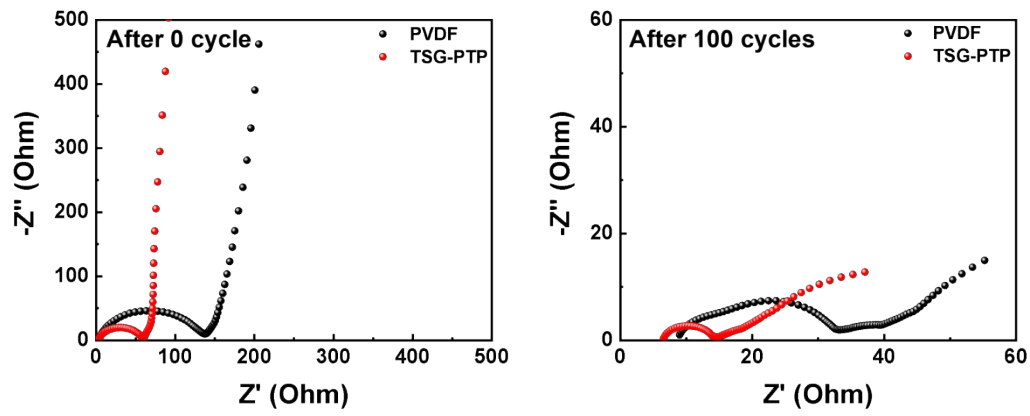

**Fig. S12.** The Nyquist plots of Li-S batteries with PVDF and TSG-PTP binders after 0 cycle and 100 cycles at 0.5 C.

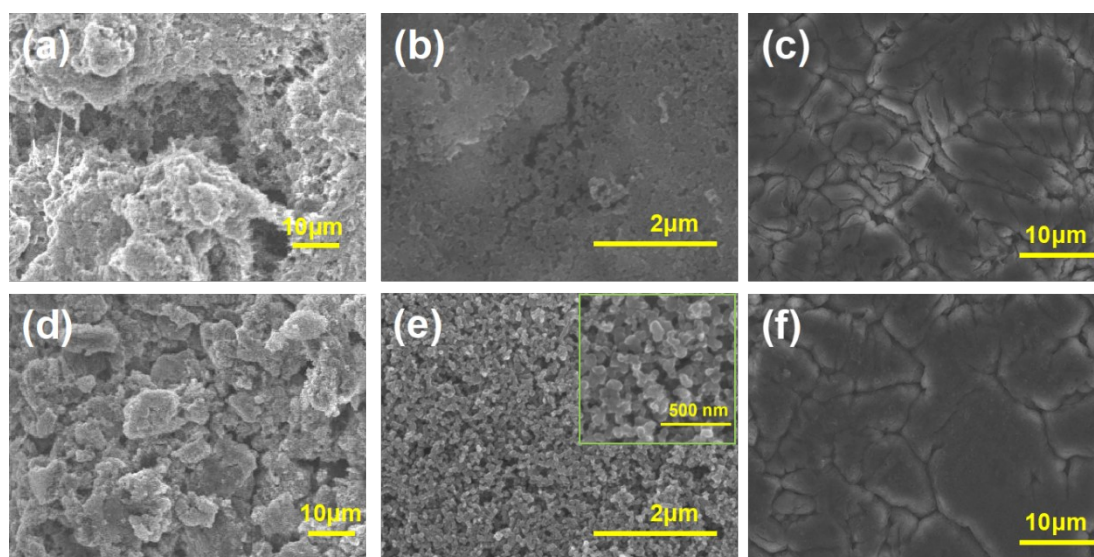

**Fig. S13.** SEM images of S@PVDF electrode (a) before cycling and (d) after 50 cycles, S@TSG-PTP electrode (b) before cycling and (e) after 50 cycles; SEM images of the lithium anodes after 50 cycles with (c) S@PVDF electrode, (f) S@TSG-PTP electrode.
